CORRECTION

## Correction: Viral escape-inspired framework for structure-guided dual bait protein biosensor design

Yee Chuen Teoh, Mohammed Sakib Noor, Sina Aghakhani, Jack Girton, Guiping Hu, Ratul Chowdhury

There are errors in the Funding statement. The correct Funding statement is as follows: This work is supported in parts by the Iowa State University Startup Grant (Building a World of Difference Faculty Fellow), Center for Industrial Research and Service (CIRAS) Mini Grant, and NSF 22–599, Established Program to Stimulate Competitive Research (EPSCoR) RII Track-1, Award Number 2242763 to RC. MSN was funded by the NSF 22–599, Established Program to Stimulate Competitive Research (EPSCoR) RII Track-1, Award Number 2242763 grant. The funders had no role in study design, data collection and analysis, decision to publish, or preparation of the manuscript.

### Reference

1. Teoh YC, Noor MS, Aghakhani S, Girton J, Hu G, Chowdhury R. Viral escape-inspired framework for structure-guided dual bait protein biosensor design. *PLoS Comput Biol*. 2025;21(4):e1012964. <https://doi.org/10.1371/journal.pcbi.1012964> PMID: [40233103](https://pubmed.ncbi.nlm.nih.gov/40233103/)

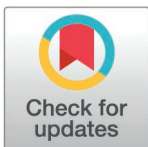

### OPEN ACCESS

**Citation:** Teoh YC, Noor MS, Aghakhani S, Girton J, Hu G, Chowdhury R (2026) Correction: Viral escape-inspired framework for structure-guided dual bait protein biosensor design. *PLoS Comput Biol* 22(6): e1014398. <https://doi.org/10.1371/journal.pcbi.1014398>

**Published:** June 12, 2026

**Copyright:** © 2026 Teoh et al. This is an open access article distributed under the terms of the [Creative Commons Attribution License](https://creativecommons.org/licenses/by/4.0/), which permits unrestricted use, distribution, and reproduction in any medium, provided the original author and source are credited.
